# Supplementary material for: Generating molecules with optimized aqueous solubility using iterative graph translation
Source: Royal Society of Chemistry journal article supplement (doi:10.1039/d1re00315a), 2021-11-15
Supplement: d1re00315a1.pdf [file d1re00315a1.pdf]

# Generating Molecules with Optimized Solubility using Iterative Graph Translation

*Camille Bilodeau<sup>1</sup>, Wengong Jin<sup>2</sup>, Hongyun Xu<sup>3</sup>, Jillian Emerson<sup>3</sup>, Sukrit Mukhopadhyay<sup>3</sup>, Tom Kalantar<sup>3</sup>,*

*Tommi Jaakkola<sup>2</sup>, Regina Barzilay<sup>2</sup>, Klavs F. Jensen (kfjensen@mit.edu)<sup>\*1</sup>*

<sup>1</sup>Department of Chemical Engineering, Massachusetts Institute of Technology, 77 Massachusetts Avenue, Cambridge, MA 02139, United States

<sup>2</sup>Computer Science and Artificial Intelligence Laboratory, Massachusetts Institute of Technology, Cambridge, MA 02139, United States

<sup>3</sup>Dow Chemical Company, Midland, MI 48674, United States

\*Corresponding Author

## Supplementary Information

### 1. Iterative Graph-to-Graph Translation

All framework, architecture, and training parameters for the iterative graph-to-graph translation procedure can be found in Table 1. The code used for training can be found here: [github.com/cbilodeau2/g2g\\_optimization](https://github.com/cbilodeau2/g2g_optimization).

**Table S1.** Framework, architecture, and training parameters for the iterative graph-to-graph translation.

| Framework Parameters         |                    |
|------------------------------|--------------------|
| Cutoff Improvement, $\alpha$ | 0.8 LogS           |
| Number of Iterations         | 3                  |
| Cutoff SA Score              | 3.5                |
| Training Parameters          |                    |
| Batch Size                   | 32                 |
| Number of CPU                | 9                  |
| Dropout                      | 0.0                |
| Learning Rate                | 1e-3               |
| Clip Norm                    | 2.0                |
| Beta                         | 0.3                |
| Number of Epochs             | 10 (per iteration) |

|                         |      |
|-------------------------|------|
| Anneal Rate             | 0.9  |
| <hr/>                   |      |
| Architecture Parameters |      |
| <hr/>                   |      |
| Activation              | ReLU |
| Aggregation             | Sum  |
| RNN Type                | LSTM |
| Hidden Size             | 270  |
| Embedding Size          | 270  |
| Latent Size             | 4    |
| Tree Depth              | 20   |
| Graph Depth             | 20   |
| Tree Iterations         | 1    |
| Graph Iterations        | 3    |
| <hr/>                   |      |

## 2. Directed Message Passing Neural Network (DMPNN)

All architecture and training parameters for the DMPNN can be found in Table 2. The resulting model for predicting solubility had  $R = 0.790$ ,  $MAE = 0.789$ , and  $RMSE = 1.038$  (Figure 1).

**Table S2.** Architecture and training parameters for the DMPNN.

| Training Parameters     |               |
|-------------------------|---------------|
| Batch Size              | 50            |
| Dropout                 | 0.0           |
| Learning Rate           | 1e-3          |
| Max Learning Rate       | 1e-2          |
| Number of Epochs        | 100           |
| Architecture Parameters |               |
| Activation              | ReLU          |
| Aggregation             | Mean          |
| Ensemble Size           | 1             |
| Depth                   | 3             |
| FFN Hidden Size         | 300           |
| FFN Depth               | 2             |
| Split Sizes             | 0.8, 0.1, 0.1 |
| Split Type              | Random        |

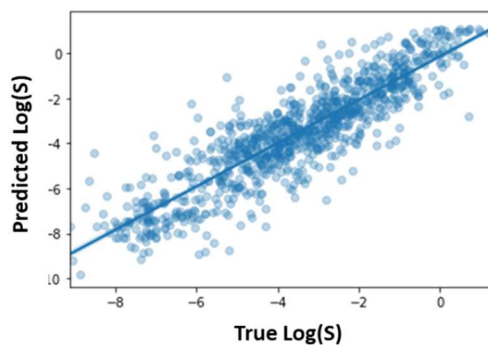

**Figure S1.** Comparison of the true and predicted Log solubilities of the test set molecules from AqSolDB.

**Table S3.** Source, catalog number, and physical properties for molecules used in solubility experiments.

| <b>Selected Molecules</b>         | <b>Supplier</b> | <b>Catalog number</b> | <b>Molar Mass<br/>(g/mol)</b> | <b>Density<br/>(g/mL)</b> |
|-----------------------------------|-----------------|-----------------------|-------------------------------|---------------------------|
| Dodecane                          | Fisher          | 117590250             | 170.33                        | 0.75                      |
| Methyl butyrate                   | Sigma Aldrich   | 246093                | 102.13                        | 0.90                      |
| 4-Chlorobutyric acid              | Sigma Aldrich   | C29835                | 122.55                        | 1.24                      |
| 2-Heptanone                       | Sigma Aldrich   | 537683                | 114.19                        | 0.82                      |
| <i>N</i> -Butoxymethyl acrylamide | Fisher          | B106025ML             | 157.21                        | 0.98                      |
| Ethyl Formate                     | Sigma Aldrich   | 112682                | 74.08                         | 0.92                      |
| Octamethyltrisiloxane             | Sigma Aldrich   | O025725ML             | 236.53                        | 0.82                      |
| Pinacolone                        | Sigma Aldrich   | P45605                | 100.16                        | 0.80                      |
| Dimethyl Glutarate                | Fisher          | G018525G              | 160.17                        | 1.09                      |
| <i>N</i> -Methylformamide         | Fisher          | F005925G              | 59.07                         | 1.01                      |
| Toluene                           | Fisher          | T290-1                | 92.14                         | 0.87                      |
| 4-Fluoroaniline                   | Fisher          | F3800                 | 111.12                        | 1.17                      |

### 3. Aqueous solubility measurement by experiments

For each selected molecules, aqueous solutions of varies concentrations are prepared to determine the solubility of the molecule. Table S3 summarize the solubility behavior and Figure 2 & 3 display the image of each solution in Table 3.

**Table S4.** Solubility behavior of the aqueous solution with the selected molecules at each concentration.

| Selected Molecules                | Target & Actual Concentration |   |       |   |       |   |       |   |       |   |        |   |        |   |        |   |
|-----------------------------------|-------------------------------|---|-------|---|-------|---|-------|---|-------|---|--------|---|--------|---|--------|---|
|                                   | 0.20%                         |   | 0.50% |   | 1%    |   | 3%    |   | 7%    |   | 15%    |   | 34%    |   | 95%    |   |
| <b>Dodecane*</b>                  | 0.18%                         | X | 0.44% | X | 0.92% | X | 3.11% | X | 6.89% | X | 15.77% | X | 33.60% | X | 94.93% | X |
| Methyl butyrate                   | 0.17%                         | O | 0.54% | O | 1.14% | O | 3.60% | X | 7.14% | X | 15.18% | X | 33.52% | X | 94.95% | X |
| 4-Chlorobutyric acid              | 0.20%                         | O | 0.70% | O | 1.37% | O | 4.07% | O | 6.15% | O | 13.78% | O | 32.20% | X | 94.89% | O |
| <b>2-Heptanone*</b>               | 0.17%                         | O | 0.47% | O | 0.92% | X | 2.91% | X | 7.27% | X | 14.85% | X | 33.25% | X | 94.98% | X |
| <i>N</i> -Butoxymethyl acrylamide | 0.16%                         | O | 0.48% | O | 0.96% | O | 3.00% | X | 7.27% | X | 13.68% | X | 34.68% | X | 95.17% | X |
| Ethyl Formate                     | 0.18%                         | O | 0.30% | O | 0.84% | O | 2.73% | O | 7.08% | O | 14.94% | X | 34.82% | X | 95.18% | O |
| <b>Octamethyl trisiloxane*</b>    | 0.19%                         | X | 0.41% | X | 0.97% | X | 2.93% | X | 6.91% | X | 14.82% | X | 33.04% | X | 94.96% | X |
| Pinacolone                        | 0.14%                         | O | 0.43% | O | 0.90% | X | 2.89% | X | 6.80% | X | 15.05% | X | 34.24% | X | 95.04% | X |
| Dimethyl Glutarate                | 0.21%                         | O | 0.46% | O | 0.98% | O | 2.92% | O | 6.49% | X | 14.34% | X | 34.05% | X | 94.90% | X |
| <i>N</i> -Methyl formamide        | 0.20%                         | O | 0.53% | O | 0.96% | O | 2.89% | O | 6.79% | O | 14.64% | O | 33.93% | O | 94.93% | O |
| <b>Toluene*</b>                   | 0.13%                         | O | 0.43% | X | 0.88% | X | 2.92% | X | 6.99% | X | 13.07% | X | 34.12% | X | 94.99% | X |
| 4-Fluoroaniline                   | 0.18%                         | O | 0.49% | O | 0.98% | O | 2.84% | X | 6.68% | X | 14.47% | X | 32.70% | X | 94.92% | X |

Note: "X" represents insoluble, where the solution is cloudy or phase separation. "O" represents soluble, where the solution is clear.

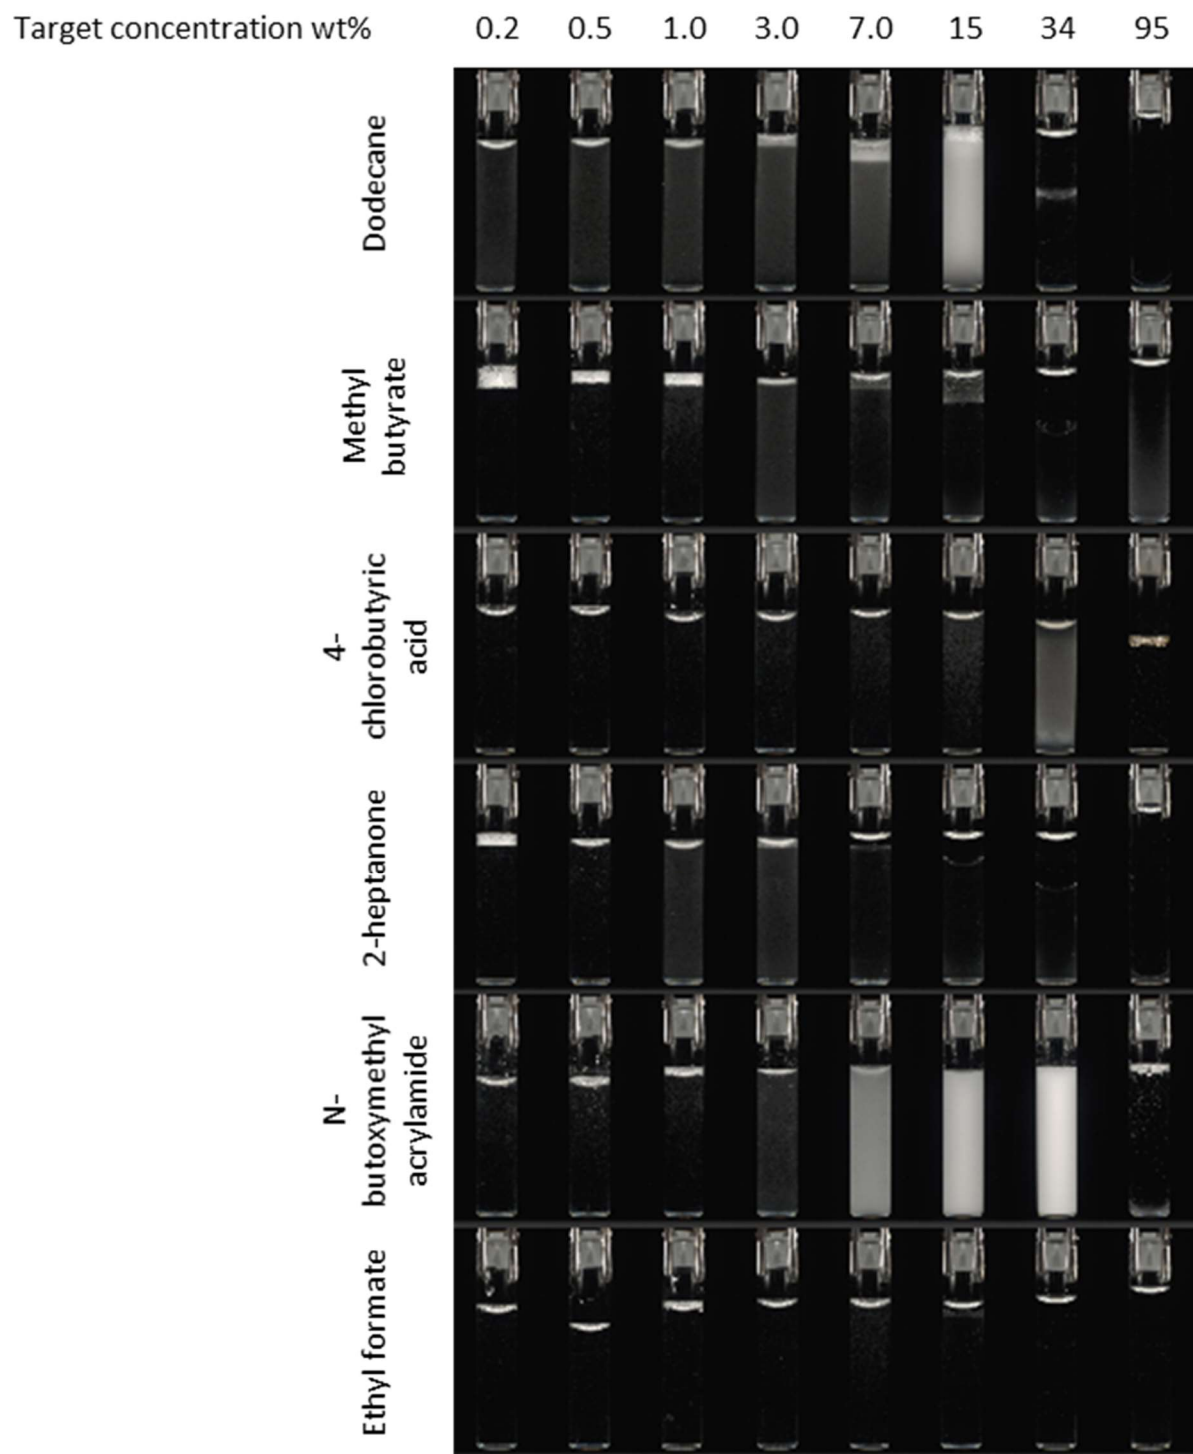

Figure S2. Images of first set of solvents in aqueous solutions.

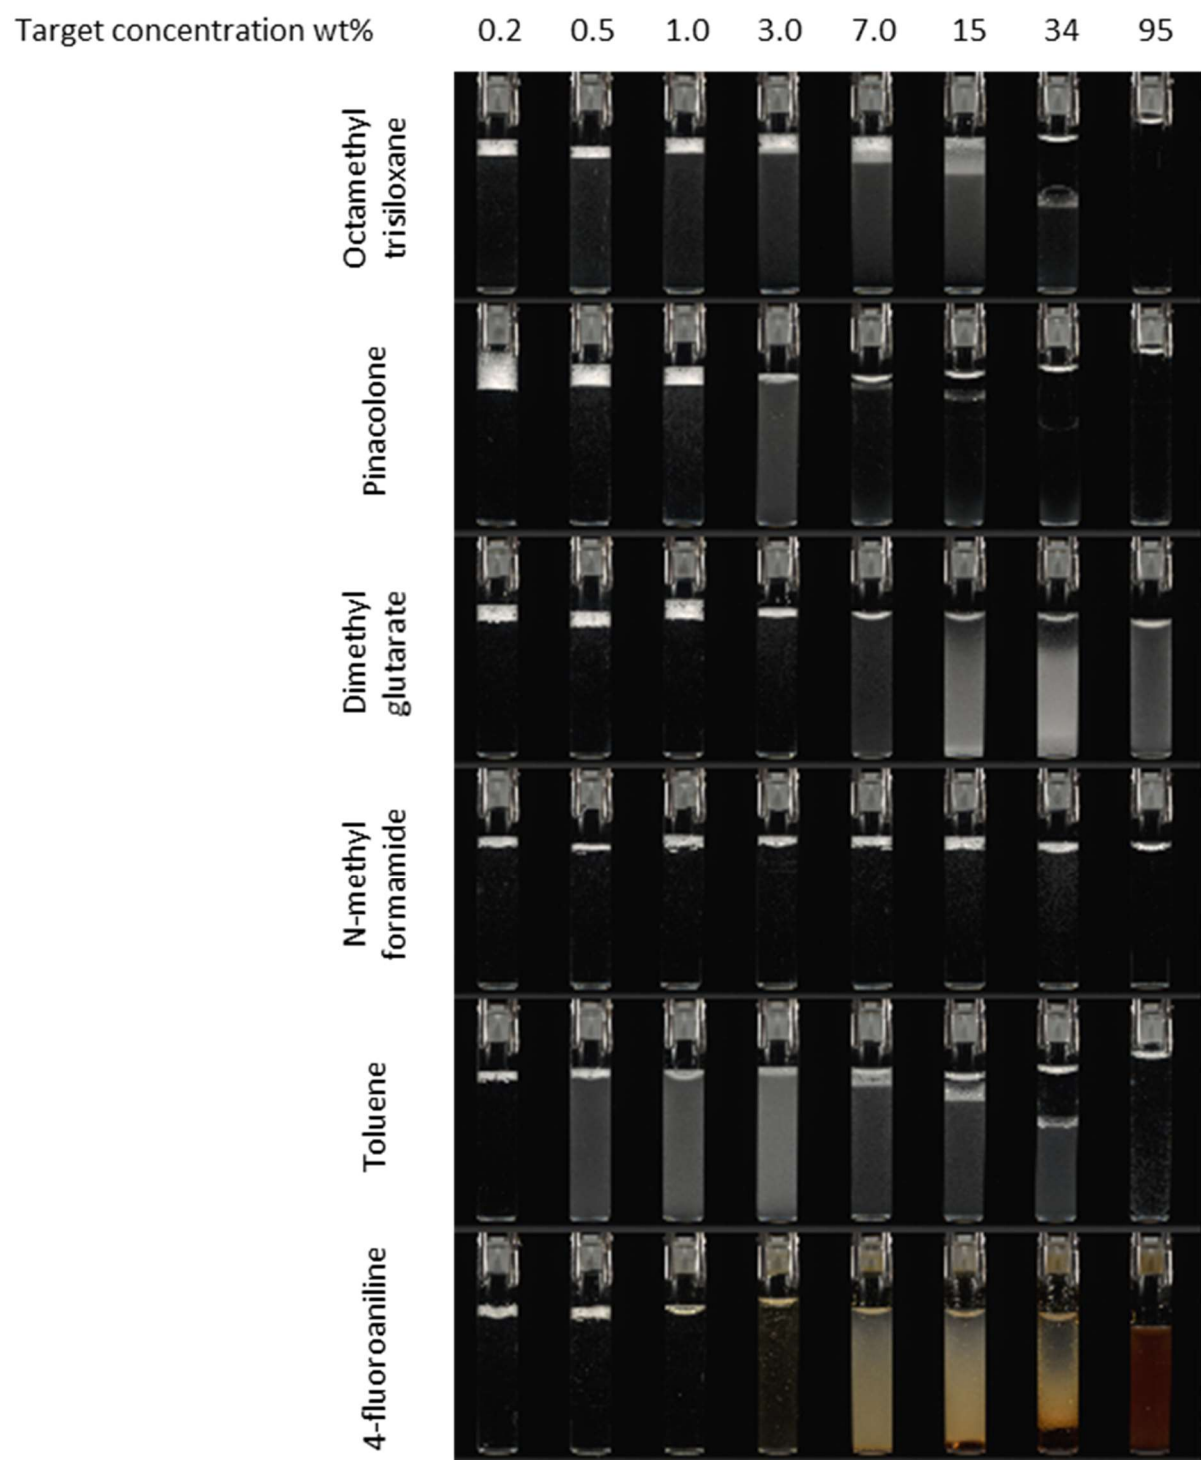

**Figure S3.** Images of second set of solvents in aqueous solutions.





|                                                           |       |
|-----------------------------------------------------------|-------|
| COc1ccc(NCP(=O)(O)O)cc1N(C)c1ccccc1                       | TRUE  |
| O=C(NCCO)Nc1ccc(O)c2c1-c1ccccc1C2CO                       | FALSE |
| CC(=O)N(C)C1CC=C(NC(=O)CNC(=O)CN)CC1                      | FALSE |
| O=C(O)c1cc(O)nc(O)n1                                      | TRUE  |
| N=Cc1cc2cc(S(=O)(=O)O)ccc2c2ccccc12                       | FALSE |
| CNC(=O)Oc1ccccc1OC(C=O)CO                                 | FALSE |
| NCC(O)COC(=O)c1cccnc1                                     | TRUE  |
| CNC(=O)C(C)(C(=O)NCC(=O)O)C1CCC(O)CC1                     | FALSE |
| CNCCC(O)(COC)c1ccc(O)c(O)c1                               | FALSE |
| CNCCNCCNCCNC(=O)Cn1c(=O)ccn(C)c1=O                        | TRUE  |
| O=C(O)c1c(C(=O)N(CCO)c2ccc(O)c(O)c2)ccc(O)c1O             | FALSE |
| Nc1ccc(S(=O)(=O)NC(N)N)cc1                                | FALSE |
| CNCC(=O)OCNC(=O)c1ccco1                                   | TRUE  |
| Cc1cnn(-c2cccc(S(=O)(=O)Nc3ccc(S(=O)(=O)O)nc3)c2)c1N      | FALSE |
| CCNCC1CO1                                                 | TRUE  |
| Cc1cc(O)c(O)c(Cc2cc(O)c(O)c(O)c2)c1                       | TRUE  |
| CNCC(O)COC(=O)c1cnc2ccccc2n1                              | TRUE  |
| CNCC(=O)Nc1ccc2c(c1)C(=O)NC2=O                            | TRUE  |
| O=P(O)(O)CSCCO                                            | FALSE |
| CCNC(=O)OCC(=O)NCC(=O)OCCOC(=O)CN                         | TRUE  |
| O=S(=O)(O)NO                                              | FALSE |
| COCNC(=O)c1ccc2cccnc2c1                                   | TRUE  |
| O=Cc1cc(O)n(CCO)n1                                        | FALSE |
| O=C(Nc1ccc(S(=O)(=O)NC(CO)NCCO)cc1)Nc1ccccc(S(=O)(=O)O)c1 | FALSE |
| CNC(=O)NCC(=O)OC                                          | TRUE  |
| CNC(=O)N(C)c1ccc(OC)cc1                                   | TRUE  |
| OCC(O)(COc1ccc(O)c(O)c1O)c1ccc(O)c(O)c1                   | FALSE |
| CCNc1cc(NCCO)n(CCO)n1                                     | FALSE |
| NCCC(N)NC(=O)CCC(=O)O                                     | FALSE |
| NC(=O)Sc1c(O)c(S(=O)(=O)O)cc2ncn(CO)c12                   | FALSE |
| O=C(NCCCCO)C(O)c1ccccc1                                   | TRUE  |
| CNCC(N)(C(=O)O)c1ccccc2cccnc12                            | FALSE |
| CCOCCN(CCO)CCOCCOCCOCCOCCOCCOCCOCCOCCOCCOCCOCCO           | TRUE  |
| Cc1c(S(=O)(=O)O)cc2ccc(S(=O)(=O)O)cc2c1N                  | FALSE |
| NC(NCC(=O)O)c1ccccc(S(=O)(=O)Nc2ccc(S(N)(=O)=O)nc2)c1     | FALSE |
| CC(=O)OCN(CCO)C(=O)C1CCCCC(O)C1                           | FALSE |
| O=C(O)COC1CCCCC1OCCO                                      | FALSE |
| CC(=O)CCc1ccn[nH]1                                        | FALSE |
| O=S(=O)(O)c1nc2ccccc2s1                                   | TRUE  |
| CC(C)NCC(O)COCNC(=O)c1ccco1                               | FALSE |
| COc1cc([N+](=O)[O-])ccc1S(=O)(=O)O                        | TRUE  |
| NNc1cc(O)c(NC(=O)c2ccc(O)cc2)cc1S(=O)(=O)O                | FALSE |
| N=C(N)NCc1ccc(O)c2c1-c1ccc(S(=O)(=O)O)cc1CC2              | FALSE |









|                                                                           |       |
|---------------------------------------------------------------------------|-------|
| CNC(=O)C(O)Cn1cncc1OC                                                     | TRUE  |
| CCC(C)(O)CC(N)C(N)=O                                                      | FALSE |
| NC(=O)C(N)(NCCCC(=O)O)c1ccnn1C(=O)[O-]                                    | FALSE |
| NC(N)OC1=c2ccccc2=C(S(=O)(=O)O)CC1                                        | FALSE |
| CCOP(=O)(OCC)OCOCN(C)CCOCCOCCOCCOCCOc1cnn(CO)c1                           | FALSE |
| O=[SH]CC(CO)(CC(=O)O)c1c(O)cc(C(=O)O)c2ccccc12                            | FALSE |
| OCNc1ncc2ncn(C(Cl)(CO)CO)c2n1                                             | FALSE |
| O=S(=O)(O)C1=NC(S(=O)(=O)[O-])CN1CCO                                      | FALSE |
| CN(CC(=O)O)C(N)Nc1ccc(O)c(NC(=O)CNC(=O)CN)c1N=Nc1ccc(O)cc1                | FALSE |
| O=C(NCO)Nc1cc(N2CC2S(=O)(=O)O)cc(S(=O)(=O)O)c1                            | FALSE |
| O=[N+][[O-])C(O)CO                                                        | TRUE  |
| CCNC1(N)CCC(S(=O)(=O)O)c2ccccc21                                          | FALSE |
| NC(O)NCCO                                                                 | FALSE |
| O=C(NO)NC1=CCC(S(=O)(=O)O)C1                                              | FALSE |
| OCCNC(CO)NC1=CCC(CO)CC1                                                   | FALSE |
| N#CCNCN                                                                   | FALSE |
| COC(=O)CN(C)C(=O)CNC(=O)N(C)CC(=O)OCCN(C)C(=O)CNC(=O)N(C)CC(=O)OCCNC(=O)C |       |
| NC(=O)COC(=O)c1cc(O)cc2oc(=O)ccc12                                        | FALSE |
| O=C(O)CC(O)(C(=O)O)C1C=CC(=O)c2ccccc21                                    | FALSE |
| COC(=O)C(O)Cc1nc(O)nc(O)n1                                                | FALSE |
| CNCCC(O)C1CCC(C(=O)OC)C1                                                  | TRUE  |
| OCC(O)OCOC(O)(c1ccccc1)c1ccc(O)cc1                                        | FALSE |
| CCC(O)C(N)C(C)(C)O                                                        | TRUE  |
| NCCNC(N)NCc1ccc(S(=O)(=O)O)c2c1C(=O)OC2                                   | FALSE |
| CC(C)NCC(O)COc1ccc(NC(=O)NCNC(=O)CN)c2nc(S(=O)(=O)O)sc12                  | FALSE |
| CP(=O)(O)c1cc2c(cc1O)C=C(S(=O)(=O)O)CC2                                   | FALSE |
| O=[SH]Cc1nc2c(ncn2CO)n1CCO                                                | FALSE |
| Cc1nc(O)nc(C(C)C(=O)N(C)C)n1                                              | FALSE |
| CC(O)(CNC(=O)CNC(=O)CN)C(O)(c1cc(O)cc(O)c1)c1cc(O)cc(O)c1O                | FALSE |
| O=C(NCO)N(CO)c1ncc[nH]1                                                   | FALSE |
| O=C(O)C(O)(C(=O)NCO)c1cc2scnc2cc1O                                        | FALSE |
| COC(=O)C(NC(=O)C1=CCCC(O)C1)C(=O)O                                        | FALSE |
| NC(=O)NC(N)(CO)NC(=O)C1CCC(O)CC1                                          | FALSE |
| NCC(O)Cc1c[nH]ccc1=O                                                      | FALSE |
| O=C1CC(=O)N(O)CN1                                                         | FALSE |
| O=C(Br)N(O)C(CO)CO                                                        | FALSE |
| OCC(O)SC1CCC(O)CC1                                                        | FALSE |
| CNC(N)NN                                                                  | FALSE |
| CNC(N)n1nccc1N                                                            | FALSE |
| CNCC(O)c1nc2cncnc2[nH]1                                                   | TRUE  |
| CC(=N)C1CCCC(N)C1                                                         | FALSE |
| Cc1nc2ncn(CCO)c2n1CC(C)(O)CN                                              | FALSE |
| NCn1nc(S(=O)(=O)O)cc1S(=O)(=O)O                                           | FALSE |
